# Supplementary material for: Transcription factor lineages in plant-pathogenic fungi, connecting diversity with fungal virulence
Source: bioRxiv preprint, doi:10.1101/2021.12.16.472873, version 1 (2021-12-16)

### Host dependence

---

- Facultative
- ◀ Not host associated
- Obligate

- Facultative
- ◄ Not host associated
- Obligate

### Lifestyle

---

- 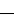 Biotroph
- 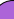 Hemibiotroph
- 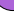 Necrotroph
- 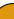 Saprophyte
- 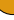 Symbiont

- 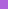 Biotroph
- 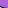 Hemibiotroph
- 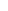 Necrotroph
- 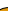 Saprophyte
- 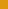 Symbiont

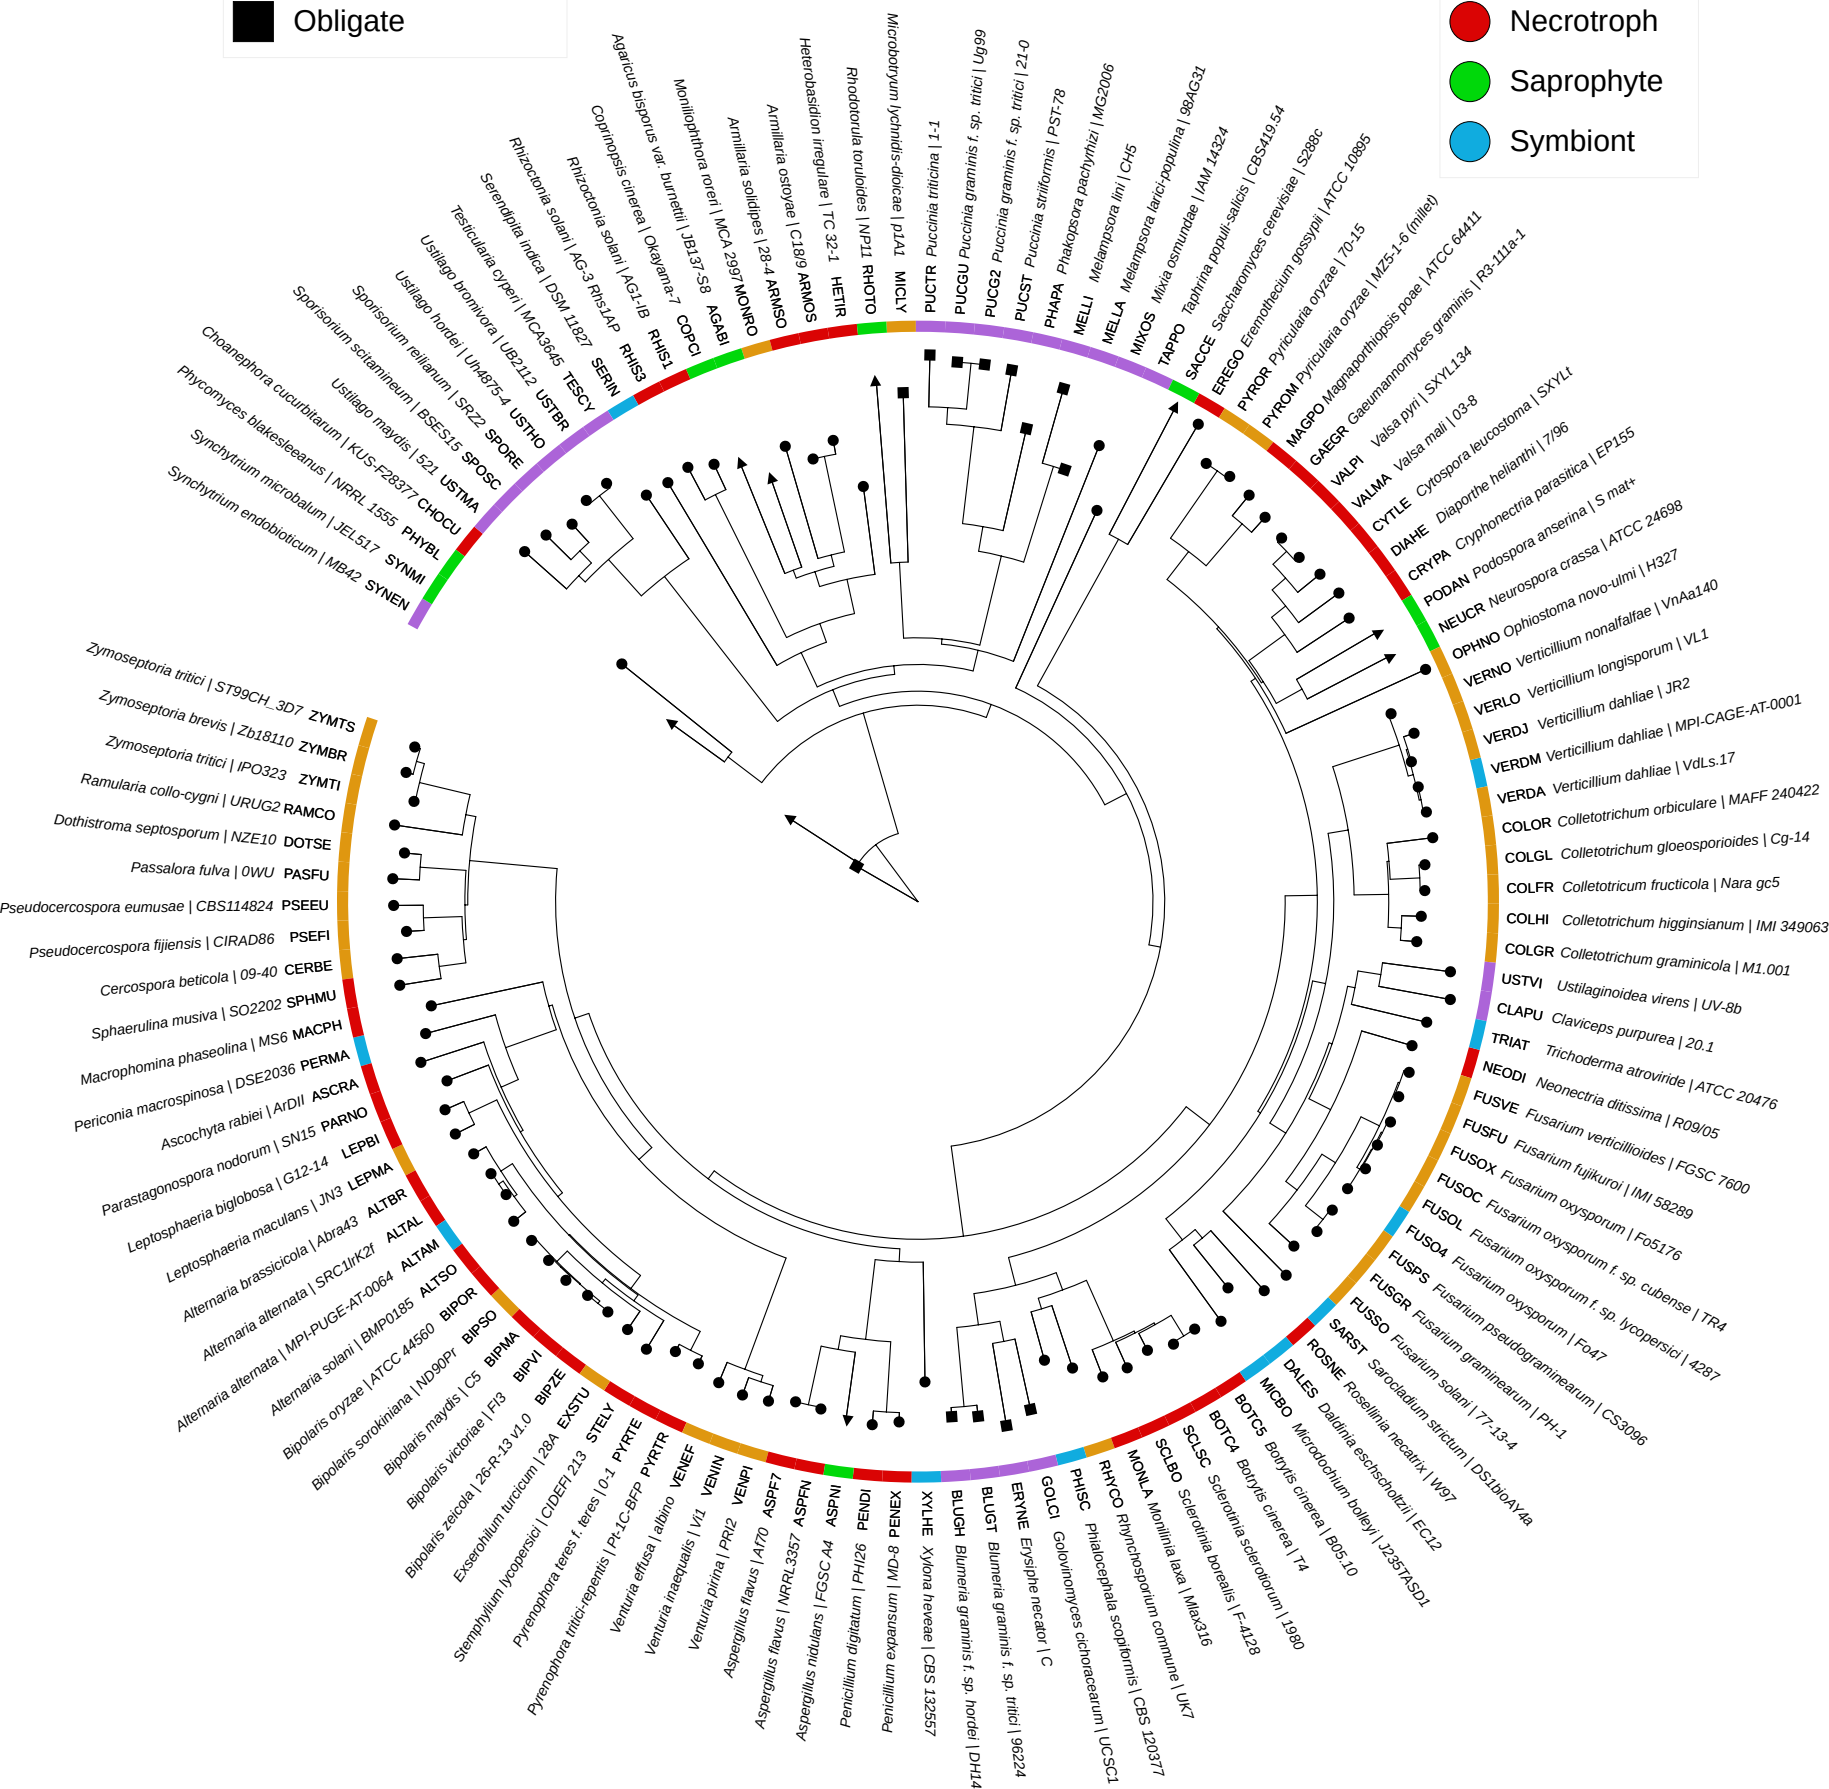

Supplement: Supplemental item 4 [file 472873_file14.pdf]
