# Supplementary material for: Transcription factor lineages in plant-pathogenic fungi, connecting diversity with fungal virulence
Source: bioRxiv or medRxiv preprint supplement (doi:10.1101/2021.12.16.472873), 2021-12-16

# Host dependence

- Facultative
- ▲ Not host associated
- Obligate

# Lifestyle

- Biotroph
- Hemibiotroph
- Necrotroph
- Saprophyte
- Symbiont

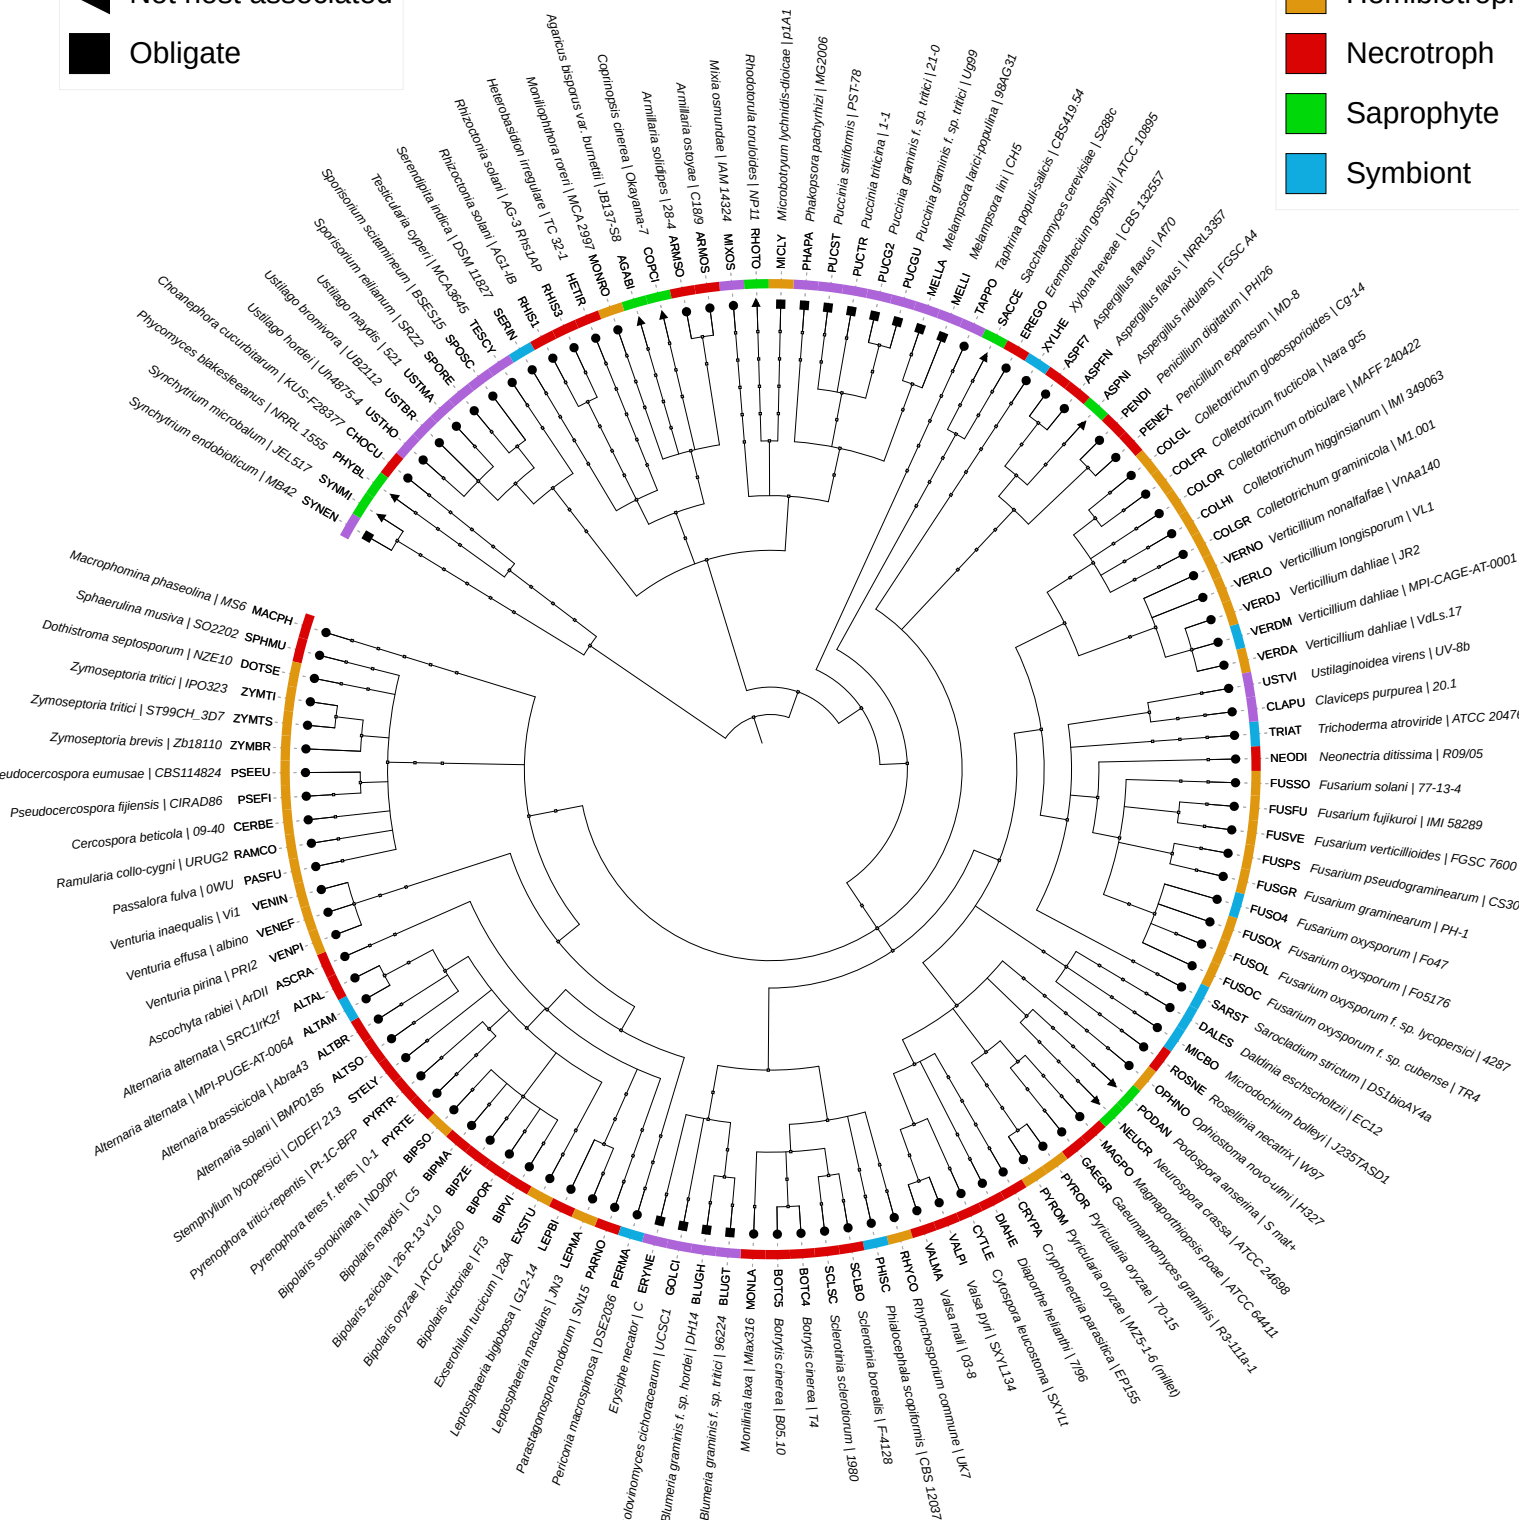

Supplement: Supplementary file [file media-5.pdf]
